# Supplementary material for: Survival Differences among Native-Born and Foreign-Born Older Adults in the United States
Source: PLOS journal article supplement (doi:10.1371/journal.pone.0037177), 2012-05-16
Supplement: S3 (10.1371/journal.pone.0037177.s003) [file journal.pone.0037177.s003]

## Appendix S1. Period Life Table Calculations

Death rates were calculated as:  $m_x = D_x / P_x$ , where  $m_x$  represents the death rate at age  $x$  in 1995;  $D_x$  is the number of deaths at age  $x$  in 1995;  $P_x$  ( $= [0.5 * (P(x, 1994) + P(x, 1995))]$ ) is the average size of the population at age  $x$  in 1995;  $P(x, 1994)$  is the population at age  $x$  at the end of 1994 or at the beginning of 1995; and  $P(x, 1995)$  is the population at age  $x$  at the end of 1995.

The standard error (SE) for the death rate  $m_x$  was calculated using the formula:<sup>2(p79)</sup>

$$SE(m_x) = \sqrt{\frac{1}{P_x} (m_x (1 - q_x))} \text{ and the 95\% confidence interval (CI) for the death rate at age } x \text{ is } m_x \pm 1.96 SE(m_x),$$

where  $q_x$  is the probability of death at age  $x$  in 1995.

Five-year survival probabilities by age, nativity, sex, and race were calculated as:  ${}_5p_x = 1 - {}_5q_x$ , where  ${}_5p_x$  represents the five-year survival probability from age  $x$  to age  $(x+5)$ , and  ${}_5q_x$  is the probability of death from age  $x$  to age  $(x+5)$ .

The SE of the five-year survival probability was estimated using the formula:<sup>2(p154)</sup>

$$SE({}_5p_x) = \sqrt{\frac{{}_5q_x^2 (1 - {}_5q_x)}{{}_5D_x}} \text{ and the 95\% CI is } {}_5p_x \pm 1.96 SE({}_5p_x), \text{ where } {}_5D_x \text{ is the number of deaths in the age interval } [x, x+5).$$

To estimate cumulative survival probabilities in the Medicare and National Center for Health Statistics (NCHS) data we used the formula:  ${}_xP_{65} = \frac{l_x}{l_{65}}$ , where  $l_x$  is the number of survivors reaching age  $x$ .

The SE of the cumulative survival probabilities in the Medicare and NCHS data was estimated as:<sup>1,2(157)</sup>

$$SE({}_xP_{65}) = \sqrt{{}_xP_{65}^2 \sum_{i=x}^{x-n} {}_n p_i^{-2} S_{n p_i}^2}, \text{ where } {}_xP_{65} \text{ is the cumulative survival from age 65 to age } x, \text{ and } S_{n p_i}^2 (=SE^2({}_n p_i)) \text{ is the variance of the survival probability from age } i \text{ to age } (i+n), \text{ and } n \text{ is the age interval (for Medicare data we used } n=1; \text{ for NCHS data we used } n=5 \text{ because the number of deaths is not available in single years).}$$

We used  $e_x = \frac{T_x}{l_x} = \frac{\sum_{i=x}^{\omega-1} {}_5L_i}{l_x}$  ( $x=65, 70, 75, 80, 85$ ) to estimate average life expectancy, where  $l_x$  is the number of persons surviving to age  $x$  and  ${}_5L_x$  is the number of person-years lived in the age interval  $[x, x+5)$  by  $l_x$ ,  $T_x$  is the total person-years lived after age  $x$  by  $l_x$ .

We used the formula:<sup>2(163)</sup>  $SE(e_x) = \sqrt{\sum_{i=x}^{\omega-1} [{}_i p_x^2 (2.5 + e_{i+5})^2 \frac{{}_5q_i^2 (1 - {}_5q_i)}{{}_5D_i}]}$  ( $i, x=65, 70, 75, 80, 85$ ) to estimate the standard error for life expectancy at age  $x$ , where  ${}_i p_x$  is the survival probability from age  $x$  to age  $i$ ,  $e_x$  is life expectancy at age  $x$  and  $\omega-1$  is the highest age group.

To estimate cumulative survival probabilities in the Medicare and National Center for Health Statistics (NCHS) data we used the formula:  $^{1,2(157)} SE({}_xP_{65}) = \sqrt{{}_xP_{65}^2 \sum_{i=x}^{x-n} {}_n p_i^{-2} S_{n p_i}^2}$ , where  ${}_xP_{65}$  is the cumulative survival from age 65 to age  $x$ ,  $n$  is the age interval (for Medicare data we used  $n=1$ ; for NCHS data we used  $n=5$  because the number of deaths is not available in single years), and  $S_{n p_i}^2 (=SE^2({}_n p_x))$  is the variance of the survival probability from age  $x$  to age  $(x+n)$ .

For the contribution to total life expectancy (TLE) for a given subpopulation (e.g., foreign-born whites), we used the difference ( $\Delta_{(e_x - e'_x)} = e_x - e'_x$ ) between the actual life expectancy of the total U.S. population at age  $x$  ( $e_x$ ) and the expected life expectancy of the total U.S. population at age  $x$  ( $e'_x$ ) if the given subpopulation experienced the age-specific mortality rates of the actual total U.S. population. In other words, for a given subpopulation, if it has lower mortality rates than the total actual U.S. population,  $e'_x$  will be smaller than  $e_x$  and the difference ( $\Delta_{(e_x - e'_x)}$ ) will be positive, indicating that the subpopulation makes a positive contribution to the TLE of the U.S. population, and so on.

The 95% CIs of the contributions to TLE were estimated by:  $\Delta_{(e_x - e'_x)} \pm 1.96SE(\Delta_{(e_x - e'_x)})$ , where  $SE(\Delta_{(e_x - e'_x)})$  is the square root of the summation of the two variances of life expectancies  $e_x$  and  $e'_x$ , that is,  $\sqrt{SE^2(e_x) + SE^2(e'_x)}$ .<sup>2(p164)</sup>

## References

1. National Center for Health Statistics (1998) Vital statistics of the United States, 1995, preprint of vol II, mortality, part A sec 6 life tables. Hyattsville, Maryland.
2. Chiang CL (1984) The Life Table and its Applications, Malabar, FL: Robert E. Krieger Publishers.
